# Supplementary material for: Impact of Liability to Periodontitis on Glycemic Control and Type II Diabetes Risk: A Mendelian Randomization Study
Source: Front Genet. 2021 Nov 25;12:767577. doi: 10.3389/fgene.2021.767577 (PMC8660586; doi:10.3389/fgene.2021.767577)
Supplement: Supplementary file 1 [file Table1.XLSX]

## Sheet: MS 767577 Supplementary Table 1
SNP	MR-IEU ID	Trait	p-value	Sample size	Beta	standard error	effect allele	other allele	effect allele frequency
rs16870060	eqtl-a-ENSG00000155097	ENSG00000155097	1.08e-12	31684	-0.144	0.02	T	G	0.1
rs2738058	eqtl-a-ENSG00000239839	ENSG00000239839	2.11e-46	5164	-0.17	0.012	C	T	0.56
	ieu-b-29	basophil cell count	2.22e-44	473999	0.029	0.002	C	T	0.56
	ukb-d-30220_irnt	Basophill percentage	2.85e-42	349861	0.033	0.002	C	T	0.56
	eqtl-a-ENSG00000223629	ENSG00000223629	1.63e-40	5164	-0.159	0.012	C	T	0.56
	ieu-b-31	monocyte cell count	1.96e-25	521592	-0.02	0.002	C	T	0.56
	ukb-d-30190_irnt	Monocyte percentage	8.89e-25	349861	-0.024	0.002	C	T	0.56
	ukb-d-30130_irnt	Monocyte count	8.54e-18	349856	-0.02	0.002	C	T	0.56
	ebi-a-GCST004609	Monocyte percentage of white cells	7.95e-16	170494	-0.029	0.004	C	T	0.56
	ebi-a-GCST004631	Basophil percentage of white cells	6.22e-15	171996	0.027	0.004	C	T	0.56
	ebi-a-GCST004608	Granulocyte percentage of myeloid white cells	1.08e-14	169545	0.028	0.004	C	T	0.56
	ebi-a-GCST004618	White blood cell count (basophil)	5.55e-14	171846	0.027	0.004	C	T	0.56
	ebi-a-GCST004625	Monocyte count	3.9e-12	170721	-0.025	0.004	C	T	0.56
	ebi-a-GCST004634	Basophil percentage of granulocytes	8.28e-12	170223	0.024	0.004	C	T	0.56
rs4284742	eqtl-a-ENSG00000254415	ENSG00000254415	1.26e-104	20792	-0.3	0.014	G	A	0.77
	eqtl-a-ENSG00000105501	ENSG00000105501	5.85e-41	26280	-0.187	0.014	G	A	0.77
	prot-a-2728	Sialic acid-binding Ig-like lectin 14	3.09e-37	3301	-0.388	0.03	G	A	0.76
	prot-a-2589	Dolichyl-diphosphooligosaccharide--protein glycosyltransferase subunit 1	6.76e-36	3301	-0.381	0.03	G	A	0.76
	eqtl-a-ENSG00000244071	ENSG00000244071	2.33e-18	4994	-0.122	0.014	G	A	0.77
	prot-c-5125_6_3	SIG14	3e-09	994	-0.31	0.052	G	A
	ukb-b-12930	Mouth/teeth dental problems: Dentures	6.9e-09	461113	0.005	0.001	G	A	0.76
rs35067614	eqtl-a-ENSG00000187037	ENSG00000187037	7.09e-71	31638	0.289	0.016	G	T	0.16
	eqtl-a-ENSG00000086288	ENSG00000086288	2.8e-19	25684	-0.147	0.016	G	T	0.16
rs10737249	eqtl-a-ENSG00000198756	ENSG00000198756	3.27E-310	26609	0.751	0.011	C	T	0.62
	eqtl-a-ENSG00000198860	ENSG00000198860	5.26e-39	31684	0.159	0.012	C	T	0.62
	ukb-b-16881	Sitting height	2e-10	461536	-0.01	0.002	C	T	0.61
	ukb-a-195	Sitting height	2.451e-08	336172	-0.011	0.002	C	T	0.61
